# Supplementary material for: Impact of delayed centrifugation on the stability of 32 biochemical analytes in blood samples collected in serum gel tubes and stored at room temperature
Source: publisher site journal article supplement (doi:10.1515/cclm-2025-0109), 2025-03-13
Supplement: Supplementary file 1 [file j_cclm-2025-0109_suppl_001.xlsx]

## Sheet: DATA
	ALANINE AMINOTRANSFERASE (U/L)				ALBUMIN (g/L)				ALKALINE PHOSPHATASE U/L)				ALPHA-AMYLASE (U/L)				ASPARTATE AMINOTRANSFERASE U/L)				CALCIUM (mmol/L)				C-REACTIVE PROTEIN (mg/L)				CHOLESTEROL (mmol/L)				CHLORIDE (mmol/L)				CREATININE (µmol/L)				CREATININE KINASE (U/L)				DIRECT BILIRUBIN (µmol/L)				FERRITIN (µg/L)
	t0	t4	t6	t8	t0	t4	t6	t8	t0	t4	t6	t8	t0	t4	t6	t8	t0	t4	t6	t8	t0	t4	t6	t8	t0	t4	t6	t8	t0	t4	t6	t8	t0	t4	t6	t8	t0	t4	t6	t8	t0	t4	t6	t8	t0	t4	t6	t8	t0
Patient 1	11	8	8	9	49	49	49	49	69	67	67	64	57	58	58	56	17	17	17	17	2.5	2.42	2.47	2.44	<0,6	<0,6	<0,6	<0,6	4.27	4.21	4.22	4.07	103	103	103	102	79	81	80	75	62	62	64	61	5.1		4.9	5.3	16
Patient 2	17	15	16	15	49	51	52	50	59	59	60	58	58	59	59	58	24	25	25	25	2.5	2.51	2.54	2.53	<0,6	<0,6	<0,6	<0,6	4.45	4.76	4.77	4.59	101	100	101	101	110	111	112	105	209	213	218		2.6		2.8	2.6	45
Patient 3	12	8	11	10	50	49	50	49	63	60	61	61	50	49	50	50	17	19	18	19	2.55	2.47	2.53	2.47	0.8	0.8	0.7	0.8	4.87	4.87	4.93	4.93	101	102	100	101	74	74	76	67	95	92	96				4	4.1	15
Patient 4	48	47	48	46	46	46	47	47	90	87	88	87	71	72	73		36	37	37	37	2.53	2.47	2.53	2.49	0.7	0.8	0.8	0.8	4.54	4.62	4.63	4.64	104	103	103	102	80	81	83	75	114	115	116				4.6	4.4	25
Patient 5	20	16	20	19	48	48	48	48	47	45	45	46	65	66	66		25	25	24	25	2.56	2.53	2.56	2.5	2	2	2	1.8	5.35	5.4	5.54	5.52	103	102	102	101	87	90	89	80	124	120	124				2.4	2.4	51
Patient 6	12	12	12	14	46	46	47	47	76	75	75	79	88	90	89	89	16	16	17	17	2.38	2.36	2.34	2.37	2.5	2.2	2.5	2.3	4.07	4.11	4.19	4.34	102	102	102	101	116	117	113	121	239	222	220	221	3.2	2.9	3	2.9	194
Patient 7	9	9	9	11	46	45	46	46	72	72	71	74	48	48	48	48	13	12	12	12	2.37	2.35	2.34	2.35	1.5	1.5	1.5	1.6	3.11	3.15	3.13	3.32	104	102	102	103	81	80	81	86	60	57	58	59	3.4	3.3	3.6	3.5	117
Patient 8	27	26	26	27	49	47	48	49	50	50	51	53	39	38	38	38	21	20	21	21	2.5	2.45	2.49	2.48	<0,6	<0,6	<0,6	<0,6	4.14	4.1	4.14	4.32	105	104	104	103	75	76	74	80	173	173	178	177	4	3.8	3.8	4	268
Patient 9	22	22	21	23	51	50	52	51	68	69	70	72	40	41	42	42	21	20	20	20	2.53	2.49	2.52	2.53	2.1	2.1	2	1.9	3.31	3.35	3.38	3.56	102	100	100	101	69	72	69	73	90	87	90	87	4.4	4.3	4.1	4.3	72
Patient 10	15	16	16	18	44	45	45	44	69	72	71	73	67	68	68	67	22	23	23	23	2.41	2.41	2.39	2.45	32	33.1	33.8	33.7	4.48	4.62	4.59	4.87	103	102	102	101	74	73	73	80	259	254	252	242	3.1	3.1	3.2	3.1	150
Patient 11	15	18	17	15	48	48	48	51	77	75	80	80	36	36	38	38	21	21	21	21	2.49	2.44	2.48	2.4	1.1	1.2	1.3	1.2	5.09	5.02	5.27	5.01	101	99	100	100	65	66	68	62	81	80	84	84	3.3	3.3	3.3	3.8	83
Patient 12	28	29	28	29	44	45	45	46	86	86	89	89	38	38	39	39	22	22	21	21	2.37	2.35	2.38	2.27	2.7	3	3	3	5.5	5.63	5.73	5.42	102	99	99	100	74	77	81	72	186	188	195	191	7.3	7.3	7.1	7.7	460
Patient 13	35	37	37	34	45	46	46	47	46	46	49	47	60	61	63	62	32	33	32	32	2.34	2.33	2.36	2.27	<0,6	<0,6	<0,6	<0,6	5.77	5.82	6.03	5.7	105	104	104	105	66	66	71	64	130	134	136	134	3	3.5	3.3	3.6	14
Patient 14	32	32	33	31	43	43	43	43	49	49	50	51	49	50	50	51	25	25	24	23	2.4	2.37	2.36	2.31	2.5	2.5	2.6	2.2	4.79	4.87	5.05	4.73	103	102	101	102	72	73	77	69	69	69	69	71	3.7	3.7	3.9	4.2	28
Patient 15	8	8	9	8	41	41	40	42	49	48	50	50	55	53	54	56	10	11	12	10	2.27	2.23	2.24	2.19	1.2	1.2	1.4	1.3	5.12	5.13	5.29	5.04	104	104	104	105	67	67	69	65	39	40	41	40	1.3	1.3	1.7		14
Patient 16	18	18	18	17	44	43	42	44	65	63	64	62	66	66	66	66	17	17	15	16	2.26	2.2	2.25	2.14	3.2	3.3	3.2	3.5	3.95	3.84	3.91	3.74	105	104	103	105	55	49	55	46	35	37	37	36	3.9	4	4.1	4.2	82
Patient 17	9	9	9	7	45	46	46	46	51	49	52	51	50	50	50	52	15	15	16	18	2.41	2.38	2.44	2.34	1.5	1.6	1.5	1.8	4.63	4.63	4.77	4.53	102	101	101	102	55	53	55	49	42	44	46	45	3.6	3.7	3.6	3.9	18
Patient 18	15	15	14	13	43	43	44	44	58	55	57	57	44	42	44	45	16	18	16	16	2.36	2.3	2.36	2.25	1.1	1.1	1.2	1	6.14	5.9	6.01	5.83	103	103	102	103	64	62	63	58	62	66	64	67	2.1	1.8	2.2		10
Patient 19	13	13	13	11	45	45	44	47	57	57	58	58	75	77	76	76	14	14	12	14	2.32	2.32	2.32	2.26	2.3	2.6	2.6	2.7	3.73	3.77	3.78	3.62	104	103	103	104	64	63	65	60	94	96	97	97	3	3.1	3.1	3.3	19
Patient 20	30	29	30	30	52	50	51	52	62	61	60	61	73	73	74	74	24	23	23	22	2.57	2.53	2.52	2.46	<0,6	<0,6	<0,6	<0,6	4.36	4.33	4.29	4.16	101	100	99	100	76	75	75	69	162	163	165	164	5.5	5.5	5.5	5.8	61
Patient 21	12	10	10	11	45	44	44	45	48	47	47	49	66	63	64	66	14	14	14	13	2.32	2.23	2.26	2.25	1.3	1.2	1.3	1.3	5.31	5.2	5.23	5.43	104	102	102	103	66	69	69	70	73	73	72	75	5.1	5.2	5	5.3	78
Patient 22	16	17	16	16	50	49	49	49	80	79	78	78	82	81	80	80	22	23	22	22	2.43	2.39	2.34	2.36	0.7	0.6	0.6	0.6	5.36	5.39	5.33	5.32	104	104	104	104	77	77	75	78	158	158	158	159	5.3	5.7	5.6	5.5	155
Patient 23	30	31	29	30	46	47	46	46	79	79	78	80	82	82	82	82	28	28	26	27	2.28	2.22	2.22	2.23	1.3	1.1	1.3	1.2	5.75	5.8	5.85	5.89	105	104	104	104	93	95	91	97	119	119	119	120	4	4.2	4.1	3.9	266
Patient 24	14	14	13	14	50	49	49	49	67	65	66	64	179	177	173	171	17	17	16	16	2.49	2.38	2.37	2.35	<0,6	<0,6	<0,6	<0,6	7.46	7.59	7.46	7.43	102	102	101	102	85	87	84	87	137	138	137	136	2.9	3.3	3.4	3.2	342
Patient 25	13	14	12	14	43	43	43	43	44	44	44	44	56	56	55	55	14	15	14	13	2.24	2.2	2.18	2.18	<0,6	<0,6	<0,6	<0,6	3.95	4.02	3.96	3.94	109	107	107	107	51	53	50	53	57	67	68	68	2.1	2.4	2.2	2.2	8
Patient 26	17	16	19	18	50	49	49	48	116	117	115	113	62	61	61	59	14	14	14	13	2.49	2.35	2.37	2.34	0.8	0.9	0.9	0.9	4.22	4.3	4.26	4.25	102	101	101	101	76	77	78	74	88	86	86	85	8.7	9.3	9.6	8.7	149
Patient 27	19	20	20	18	50	48	49	48	86	84	84	83	53	52	52	52	21	20	20	21	2.38	2.3	2.29	2.28	9.6	9.6	9.8	9.6	4.04	3.99	4.03	4.07	99	100	99	99	108	103	106	103	93	91	89	89	2.6	3	3	2.5	182
Patient 28	32	31	32	30	48	47	46	46	66	66	64	64	64	64	63	62	17	16	17	17	2.4	2.33	2.33	2.33	1.1	1.1	1	1.1	4.35	4.47	4.48	4.38	105	104	104	105	81	81	83	80	147	149	144	141	3.7	3.9	4	3.7	173
Patient 29	32	35	36	34	52	52	52	51	74	74	72	70	44	44	44	43	32	33	32	31	2.52	2.45	2.47	2.44	<0,6	<0,6	<0,6	<0,6	7.25	7.5	7.32	7.26	101	100	100	100	91	92	95	91	300	302	296	283	4.1	4	4	3.8	448
Patient 30	21	21	22	21	45	44	46	45	88	87	88	87	60	60	60	61	20	20	20	20	2.34	2.23	2.25	2.3	5.4	5.5	5.4	5.6	4.27	4.36	4.31	4.45	103	104	103	103	72	70	70	71	274	259	249	251	4	3.9	4.1	3.9	497
Patient 31	16	15	15	15	47	47	48	48	46	47	48	48	32	32	34	34	19	20	20	20	2.41	2.35	2.3	2.33	<0,6	<0,6	<0,6	<0,6	4.97	5.17	5.14	5.33	103	102	102	103	56	51	50	49	253	255	259	264	3.1	3.8	3.7	3.6	9
Patient 32	14	13	13	13	49	48	50	49	89	90	90	89	68	68	68	68	14	14	14	14	2.39	2.33	2.31	2.3	<0,6	<0,6	<0,6	<0,6	4.16	4.26	4.31	4.19	100	99	100	100	100	94	92	92	109	111	114	111	6.2	6.5	6.1	6.4	342
Patient 33	21	20	18	20	45	44	45	45	97	98	97	98	47	48	48	47	17	16	17	18	2.39	2.32	2.3	2.32	3.1	3.1	3	3.1	3.77	3.79	3.81	3.77	103	102	102	102	72	64	64	65	129	130	132	132	4.8	5.2	5.2	5.3	67
[truncated: 79 more columns]
